# Supplementary material for: Peroxiredoxin I is important for cancer-cell survival in Ras-induced hepatic tumorigenesis
Source: PubMed Central journal article supplement (PMC5356538; doi:10.18632/oncotarget.11172), 2016-08-10
Supplement: oncotarget-07-68044-s001.pdf [file oncotarget-07-68044-s001.pdf]

## Peroxiredoxin I is important for cancer-cell survival in Ras-induced Hepatic tumorigenesis

### Supplementary Materials

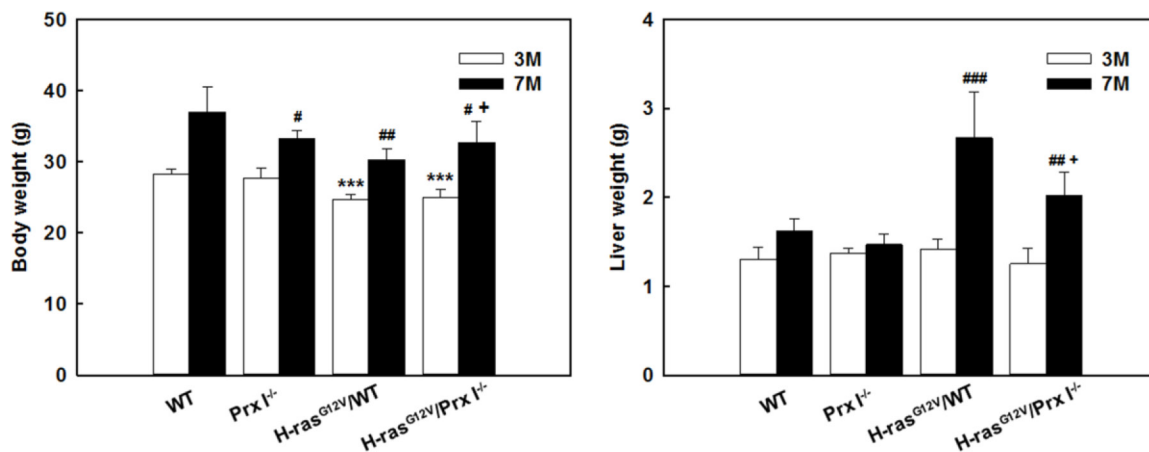

**Supplementary Figure S1: The effect of Prx I knockout on body weight and liver weight of H-ras<sup>G12V</sup> transgenic mouse.** The body weight and liver weight of WT, Prx1<sup>-/-</sup>, H-ras<sup>G12V</sup>/WT, and H-ras<sup>G12V</sup>/Prx1<sup>-/-</sup> mice at indicated time points are shown. 3 M, 3 months; 7 M, 7 months. \*\*\* $p < 0.001$  compared to WT mice at the age of 3 months, # $p < 0.05$ , ## $p < 0.01$ , ### $p < 0.001$  compared to WT mice at the age of 7 months, and + $p < 0.05$  compared to H-ras<sup>G12V</sup>/WT mice at the age of 7 months. The data were repeated in at least three separate experiments and presented as mean  $\pm$  SD.

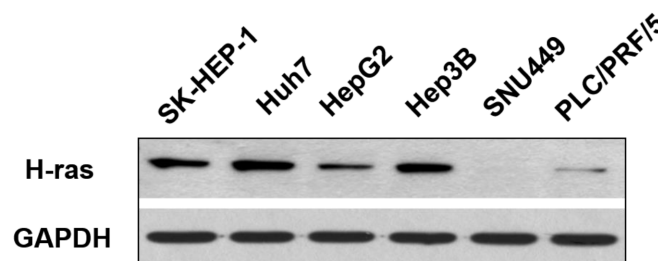

**Supplementary Figure S2: Western blotting analysis of H-ras expression in HCC cells.** The data were repeated in at least three separate experiments.
